# Supplementary material for: Feeling Unsafe at School and Associated Mental Health Difficulties among Children and Adolescents: A Systematic Review
Source: Children (Basel). 2021 Mar 17;8(3):232. doi: 10.3390/children8030232 (PMC8002666; doi:10.3390/children8030232)
Supplement: Supplementary file 1 [file children-08-00232-s001.pdf]

---

# Feeling Unsafe at School and Associated Mental Health Difficulties among Children and Adolescents: A Systematic Review - Supplementary Materials -

**Table S1.** Search strings used in databases.

| Databases        | Search String                                                                                                                     |
|------------------|-----------------------------------------------------------------------------------------------------------------------------------|
| PubMed           | "school safet*" AND (child* OR adolesc* OR teen* OR preteen* OR youth* OR "Child"[Mesh] OR "Adolescent"[Mesh])                    |
| CINAHL (EBSCO)   | "school safet*" AND (child* OR adolesc* OR teen* OR preteen* OR youth* OR MH "Child" OR MH "Adolescence")                         |
| PsycINFO (EBSCO) | ("school safet*" OR DE "school safety") AND (child* OR adolesc* OR teen* OR preteen* OR youth*)                                   |
| ERIC (EBSCO)     | ("school safet*" OR DE "School Safety") AND (child* OR adolesc* OR teen* OR preteen* OR youth* OR DE "Youth" OR DE "Adolescents") |
| Web of Science   | "school safet*" AND (child* OR adolesc* OR teen* OR preteen* OR youth*)                                                           |

---

**Table S2.** Characteristics of the studies that were included in this review.

| Author             | Country   | Participants | Response rate (%)      | Age (Grade)                 | Measure                                           | Response              | Data collected year | Design | Setting |
|--------------------|-----------|--------------|------------------------|-----------------------------|---------------------------------------------------|-----------------------|---------------------|--------|---------|
| Arora 2018         | US        | 1,354        | 82                     | M 14.20 (1993) 17.84 (1995) | 8 items (e.g., I do not feel safe)                | 3, 4-point Likert     | 1993, 1995          | CS     | S       |
| Atteberry-Ash 2019 | US        | 11,986       | 85                     | M 15.7                      | I feel safe at my school                          | 4-point Likert        | 2015                | CS     | S       |
| Bachman 2011       | US        | 20,138       | 82                     | 5,8,11 grades               | I feel safe in my school                          | Yes/No 5-point Likert | 2007                | CS     | E/S     |
| Bear 2018          | US, China | 7,261        | 81.9 (US) 94.9 (China) | 3–5, 7–8, 10–12 grades      | 3 items (e.g., Students are safe in the hallways) | 4-point Likert        | NR                  | CS     | E/S     |
| Bowser 2018        | US        | 5,138        | 96                     | 6-8 grades                  | How often do you feel safe and secure at school?  | 5-point Likert        | 2015                | CS     | S       |
| Docherty 2020      | US        | 122,840      | 62-85                  | 8,10,12 grades              | I feel safe at my school                          | 4-point Likert        | 2014,2016,2018      | CS     | S       |
| Earnest 2016       | US        | 75,590       | 90                     | 9,12 grades                 | I feel safe at school                             | 4-point Likert        | 2010                | CS     | S       |
| Eisenberg 2007     | US        | 83,731       | 97                     | 6,9,12 grades               | 3 items (e.g., I feel safe at school)             | 4-point Likert        | 2004                | CS     | S       |
| Esselmont 2014     | US        | 7,464        | 82                     | 6-10 grades                 | I feel safe at this school                        | 5-point Likert        | 2002                | CS     | S       |
| Eugene 2020        | US        | 9,518        | NR                     | 10, 12 grades               | 3 items (e.g., Does not feel safe at this school) | 4-point Likert        | 2002, 2004          | LS     | S       |
| Garnett 2018       | US        | 2,481        | 95                     | M 14.5                      | 4 items (e.g., I feel safe at school)             | 5-point Likert        | 2015                | CS     | S       |
| Gase 2017          | US        | 33,572       | NR                     | 6-12 grades                 | 2 items (e.g., student feels safe at school)      | 5-point Likert        | 2015                | CS     | S       |

|                |        |         |      |                  |                                                                         |                |                  |    |   |
|----------------|--------|---------|------|------------------|-------------------------------------------------------------------------|----------------|------------------|----|---|
| Gini 2018      | Italy  | 1,378   | 85   | 6-10 grades      | I feel safe in my class                                                 | 5-point Likert | 2016             | CS | S |
| Glew 2008      | US     | 5,391   | 87   | 7,9,11 grades    | I feel safe at my school                                                | 5-point Likert | 2002             | CS | S |
| Goldweber 2013 | US     | 12,763  | 100  | 6-12 grades      | 2 items (e.g., I feel safe at this school)                              | 4-point Likert | 2008             | CS | S |
| Hamada 2018    | Japan  | 1,865   | 92.8 | M 13.9           | Do you feel secure at school?                                           | 4-point Likert | 2011             | CS | S |
| Hong 2012      | US     | 1,249   | 70   | 10-15 years old  | I don't feel safe at this school                                        | 4-point Likert | 2004, 2006       | CS | S |
| Hong 2016      | US     | 4,118   | 94   | 9-12 grades      | I don't feel safe at this school                                        | 4-point Likert | 1995             | CS | S |
| Konishi 2017   | Canada | 48,874  | 97   | 8-12 grades      | 3 items (e.g., I feel safe at school)                                   | 5-point Likert | 2008             | CS | S |
| Lacoe 2020     | US     | 658,122 | 80   | 6-8 grades       | I am safe in my classes                                                 | 4-point Likert | 2007-2010        | LS | S |
| Lear 2020      | US     | 13,449  | 66   | 6,8,10,12 grades | How often do you feel unsafe at school                                  | 5-point Likert | 2016             | CS | S |
| Lindstrom 2018 | US     | 54,350  | NR   | 6-12 grades      | 4 items (e.g., I feel safe at this school)                              | 4-point Likert | 2014, 2016       | CS | S |
| López 2020     | Chile  | 50,344  | 50<  | 5-8 grades       | 2 items (e.g., I feel fear in my school)                                | 4-point Likert | 2017             | CS | E |
| Lorenzo 2016   | US     | 1,919   | 92   | 9-11 grades      | 6 items (e.g., My school is a safe and protected place)                 | 4-point Likert | 2005, 2006, 2007 | LS | S |
| March, 2010    | US     | 6,989   | 83   | 9-12 grades      | Several items (e.g., felt unsafe at school or on way to or from school) | NR             | 2003             | CS | S |
| Meldrum 2018   | US     | 7,958   | 69   | M 14.36          | I feel safe at my school                                                | 4-point Likert | 2017             | CS | S |

|                       |             |         |                            |                      |                                                    |                |            |    |     |
|-----------------------|-------------|---------|----------------------------|----------------------|----------------------------------------------------|----------------|------------|----|-----|
| Mitchell 2018         | US          | 5,441   | 66                         | 3-12 grades          | 9 items (e.g., I feel safe inside the school)      | 5-point Likert | 2009       | CS | E/S |
| Mooij, Fettelaar 2012 | Netherlands | 71,560  | NR                         | M 14.3               | 7 items different locations                        | Yes/No         | 2008       | CS | S   |
| Moore 2018            | US          | 1,169   | NR                         | 9,11 grades          | 2 items (e.g., I feel safe in my school)           | 5-point Likert | 2013       | CS | S   |
| Mowen 2019            | US          | 15,362  | NR                         | 10 grade             | 2 items (e.g., if they felt safe at the school)    | 4-point Likert | 2002       | CS | S   |
| Nijs 2014             | Netherlands | 11,130  | 98                         | 11-19 years old      | Do you ever feel unsafe at school?                 | 4-point Likert | 2007       | CS | S   |
| Pampati 2020          | US          | 542     | 66.8                       | 13< (88%=>15)        | Do you feel safe at school?                        | Yes/No         | 2016       | CS | S   |
| Pentek 2018           | US          | 126,868 | NR                         | 8,9,11 grades        | I feel safe at school                              | 4-point Likert | 2016       | CS | S   |
| Perumean-Chaney 2013  | US          | 13,386  | NR                         | 7-12 grades          | You feel safe in your school                       | 4-point Likert | 1995, 1996 | CS | S   |
| Pistella 2020         | US          | 31,609  | NR                         | 6-12 grades          | 2 items (e.g., I feel safe in my school)           | 5-point Likert | 2013-2015  | CS | S   |
| Radu 2018             | US          | 4,130   | 90                         | 12-14 years old      | Do you feel safe at school?                        | 4-point Likert | 1997       | CS | S   |
| Rose 2018             | US          | 9,619   | 67                         | 9-12 grades          | Do you feel safe at your school?                   | Yes/No         | 2016       | CS | S   |
| Skiba 2004            | US          | 2,231   | 59-87                      | 6-12 grades          | Overall, I feel that this school is a safe school. | 5-point Likert | 2001       | CS | S   |
| Taliaferro 2019       | US          | 1,635   | 75                         | 9,11 grades          | I feel safe at school                              | 4-point Likert | 2016       | CS | S   |
| Tiiri 2020            | Finland     | 3,997   | 90.2 (2008)<br>91.8 (2014) | M 14.4<br>7,9 grades | I feel safe at school                              | 4-point Likert | 2008, 2014 | CS | S   |
| Vaillancourt 2010     | Canada      | 11,152  | 94                         | 4-12 grades          | Several items different locations and time         | 5-point Likert | 2008       | CS | E/S |

---

|             |        |       |    |                  |                                                      |                   |    |    |   |
|-------------|--------|-------|----|------------------|------------------------------------------------------|-------------------|----|----|---|
| Yablon 2010 | Israel | 2,199 | NR | 6,8,10<br>grades | Several items different<br>locations                 | 5-point<br>Likert | NR | CS | S |
| Yablon 2019 | Israel | 609   | 94 | 9-12 grades      | 6 items (e.g., I do not<br>feel safe in this school) | 5-point<br>Likert | NR | CS | S |

---

Note: Schools: elementary (E) and secondary (S). CS = Cross-sectional, LS = Longitudinal, NR = Not reported, M = mean age.

**Table S3.** Results of quality assessment of the observational included studies.

| Author                | CK1 | CK2 | CK3 | CK4 | CK5 | CK6 | CK7 | CK8 | CK9 | CK10 | CK11 | CK12 | CK13 | CK14 | Overall quality |
|-----------------------|-----|-----|-----|-----|-----|-----|-----|-----|-----|------|------|------|------|------|-----------------|
| Arora 2018            | Yes | Yes | Yes | Yes | Yes | No  | No  | NA  | Yes | No   | No   | NA   | NA   | Yes  | Good            |
| Atteberry-Ash 2019    | Yes | Yes | Yes | Yes | Yes | No  | No  | NA  | Yes | No   | No   | NA   | NA   | Yes  | Fair            |
| Bachman 2011          | No  | Yes | Yes | Yes | Yes | No  | No  | NA  | No  | No   | No   | NA   | NA   | Yes  | Fair            |
| Bear 2018             | Yes | Yes | Yes | Yes | Yes | No  | No  | NA  | Yes | No   | No   | NA   | NA   | Yes  | Good            |
| Bowser 2018           | No  | Yes | Yes | Yes | Yes | No  | No  | Yes | No  | No   | No   | NA   | NA   | Yes  | Fair            |
| Docherty 2020         | Yes | Yes | Yes | Yes | Yes | No  | No  | Yes | Yes | No   | Yes  | NA   | NA   | Yes  | Fair            |
| Earnest 2016          | Yes | Yes | Yes | Yes | Yes | No  | No  | NA  | Yes | No   | No   | NA   | NA   | Yes  | Good            |
| Eisenberg 2007        | No  | Yes | Yes | Yes | Yes | No  | No  | NA  | Yes | No   | No   | NA   | NA   | Yes  | Fair            |
| Esselmont 2014        | Yes | Yes | Yes | Yes | Yes | No  | No  | NA  | Yes | No   | No   | NA   | NA   | Yes  | Good            |
| Eugene 2020           | Yes | No   | Yes  | NA   | Yes  | Yes  | Good            |
| Garnett 2018          | Yes | Yes | Yes | Yes | Yes | No  | No  | NA  | Yes | No   | No   | NA   | NA   | Yes  | Good            |
| Gase 2017             | Yes | Yes | Yes | Yes | Yes | No  | No  | NA  | No  | No   | No   | NA   | NA   | Yes  | Fair            |
| Gini 2018             | Yes | Yes | Yes | Yes | Yes | No  | No  | NA  | Yes | No   | No   | NA   | NA   | No   | Fair            |
| Glew 2008             | Yes | Yes | Yes | Yes | Yes | No  | No  | NA  | Yes | No   | No   | NA   | NA   | Yes  | Good            |
| Goldweber 2013        | Yes | Yes | Yes | Yes | Yes | No  | No  | NA  | Yes | No   | No   | NA   | NA   | Yes  | Good            |
| Hamada 2018           | Yes | Yes | Yes | Yes | Yes | No  | No  | NA  | Yes | No   | No   | NA   | NA   | Yes  | Fair            |
| Hong 2012             | No  | Yes | Yes | Yes | Yes | No  | No  | NA  | Yes | No   | No   | NA   | NA   | No   | Fair            |
| Hong 2016             | Yes | Yes | Yes | Yes | Yes | No  | No  | NA  | Yes | No   | No   | NA   | NA   | No   | Good            |
| Konishi 2017          | Yes | Yes | Yes | Yes | Yes | No  | No  | NA  | Yes | No   | No   | NA   | NA   | Yes  | Good            |
| Lacoe 2020            | Yes  | Yes  | NA   | Yes  | Yes  | Good            |
| Lear 2020             | Yes | Yes | Yes | Yes | Yes | No  | No  | Yes | Yes | No   | Yes  | NA   | NA   | Yes  | Good            |
| Lindstrom 2018        | Yes | Yes | NR  | Yes | Yes | No  | No  | NA  | Yes | No   | No   | NA   | NA   | Yes  | Fair            |
| López 2020            | Yes | Yes | Yes | Yes | Yes | No  | No  | Yes | Yes | No   | Yes  | NA   | NA   | Yes  | Good            |
| Lorenzo 2016          | Yes | Yes | Yes | Yes | Yes | No  | No  | NA  | Yes | Yes  | No   | NA   | Yes  | Yes  | Good            |
| March, 2010           | Yes | Yes | Yes | Yes | Yes | No  | No  | NA  | Yes | No   | No   | NA   | NA   | No   | Fair            |
| Meldrum 2018          | Yes | Yes | Yes | Yes | Yes | No  | No  | NA  | No  | No   | No   | NA   | NA   | Yes  | Fair            |
| Mitchell 2018         | Yes | Yes | Yes | Yes | Yes | No  | No  | NA  | Yes | No   | No   | NA   | NA   | Yes  | Good            |
| Mooij, Fettelaar 2012 | Yes | Yes | NR  | Yes | Yes | No  | No  | NA  | Yes | No   | No   | NA   | NA   | Yes  | Fair            |

|                      |     |     |     |     |     |    |    |     |     |    |     |    |    |     |      |
|----------------------|-----|-----|-----|-----|-----|----|----|-----|-----|----|-----|----|----|-----|------|
| Moore 2018           | Yes | Yes | NR  | Yes | Yes | No | No | NA  | Yes | No | No  | NA | NA | Yes | Fair |
| Mowen 2019           | Yes | Yes | NR  | Yes | Yes | No | No | NA  | Yes | No | No  | NA | NA | Yes | Fair |
| Nijs 2014            | Yes | Yes | Yes | Yes | Yes | No | No | NA  | Yes | No | No  | NA | NA | Yes | Good |
| Pampati 2020         | Yes | Yes | Yes | Yes | Yes | No | No | Yes | Yes | No | Yes | NA | NA | Yes | Fair |
| Pentek 2018          | Yes | Yes | NR  | Yes | Yes | No | No | NA  | Yes | No | No  | NA | NA | Yes | Good |
| Perumean-Chaney 2013 | Yes | Yes | Yes | Yes | Yes | No | No | NA  | Yes | No | No  | NA | NA | Yes | Good |
| Pistella 2020        | Yes | Yes | NR  | Yes | Yes | No | No | Yes | Yes | No | Yes | NA | NA | Yes | Fair |
| Radu 2018            | Yes | Yes | Yes | Yes | Yes | No | No | NA  | Yes | No | No  | NA | NA | Yes | Good |
| Rose 2018            | Yes | Yes | Yes | Yes | Yes | No | No | NA  | Yes | No | No  | NA | NA | Yes | Good |
| Skiba 2004           | No  | Yes | Yes | Yes | Yes | No | No | NA  | Yes | No | No  | NA | NA | Yes | Fair |
| Taliaferro 2019      | Yes | Yes | Yes | Yes | Yes | No | No | NA  | Yes | No | No  | NA | NA | Yes | Good |
| Tiiri 2020           | Yes | Yes | Yes | Yes | Yes | No | No | NA  | Yes | No | No  | NA | NA | Yes | Good |
| Vaillancourt 2010    | No  | Yes | Yes | Yes | Yes | No | No | NA  | Yes | No | No  | NA | NA | Yes | Fair |
| Yablon 2010          | Yes | Yes | Yes | Yes | Yes | No | No | NA  | Yes | No | No  | NA | NA | Yes | Good |
| Yablon 2019          | Yes | Yes | Yes | Yes | No  | No | No | NA  | Yes | No | No  | NA | NA | Yes | Fair |

Note: Quality of included studies was assessed using the National Institutes of Health (NIH) Quality Assessment tool for Observational Cohort and Cross-Sectional Studies (<https://www.nhlbi.nih.gov/health-pro/guidelines/in-develop/cardiovascular-risk-reduction/tools/cohort>). CK 1. Was the research question or objective in this paper clearly stated? CK 2. Was the study population clearly specified and defined? CK 3. Was the participation rate of eligible persons at least 50%? CK 4. Were all the subjects selected or recruited from the same or similar populations (including the same time period)? Were inclusion and exclusion criteria for being in the study prespecified and applied uniformly to all participants? CK 5. Was a sample size justification, power description, or variance and effect estimates provided? CK 6. For the analyses in this paper, were the exposure(s) of interest measured prior to the outcome(s) being measured? CK 7. Was the timeframe sufficient so that one could reasonably expect to see an association between exposure and outcome if it existed? CK 8. For exposures that can vary in amount or level, did the study examine different levels of the exposure as related to the outcome (e.g., categories of exposure, or exposure measured as continuous variable)? CK 9. Were the exposure measures (independent variables) clearly defined, valid, reliable, and implemented consistently across all study participants? CK 10. Was the exposure(s) assessed more than once over time? CK 11. Were the outcome measures (dependent variables) clearly defined, valid, reliable, and implemented consistently across all study participants? CK 12. Were the outcome assessors blinded to the exposure status of participants? CK 13. Was loss to follow-up after baseline 20% or less? CK 14. Were key potential confounding variables measured and adjusted statistically for their impact on the relationship between exposure(s) and outcome(s)? CK, check list; CD, cannot be determined; NA, not applicable; NR, not reported.
